# Supplementary material
Source: PubMed Central journal article supplement (PMC4106378)
Supplement: Supp_Fig1.pdf [file Supp_Fig1.pdf]

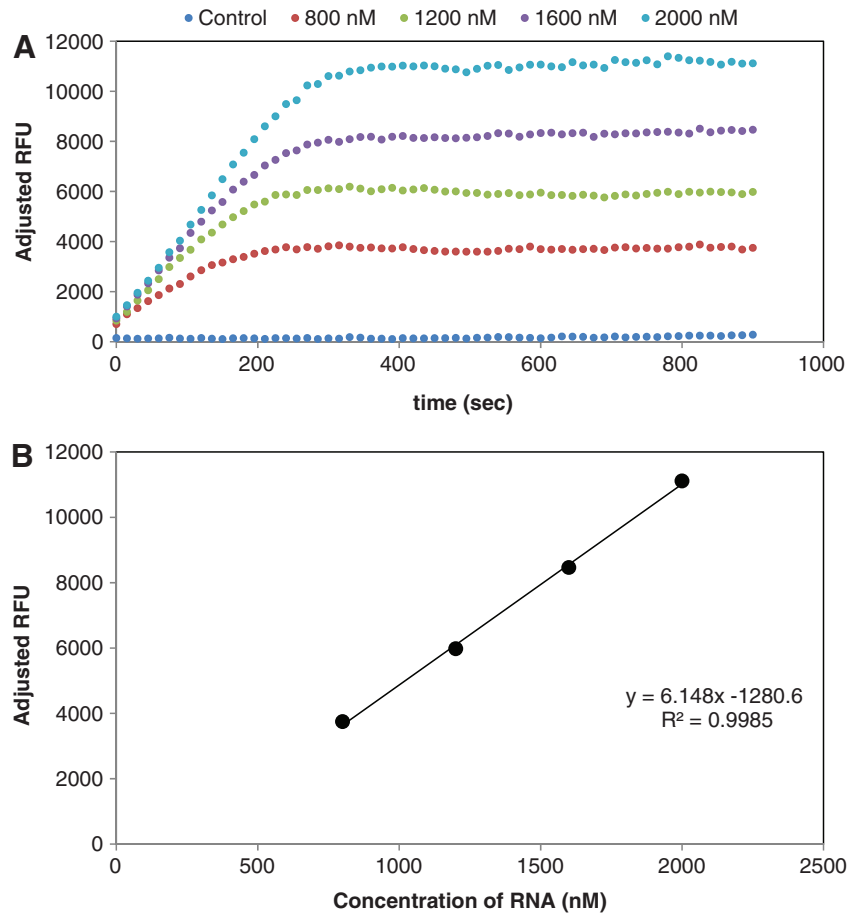

**SUPPLEMENTARY FIG. S1.** Recycling of antisense oligonucleotides in antisense reaction. **(A)** Time-dependent fluorescence increased under conditions of 10 nM ApoB-13a, 800 (red); 1,200 (green), 1,600 (purple) and 2,000 (cyan) nM target RNA (DL-MRNA:NL-MRNA = 1:3); and 300 units/mL *E.coli* RNase H. Conditions of 10 nM ApoB-13a and 800 nM target RNA (DL-MRNA:NL-MRNA = 1:3) with no *Escherichia coli* RNase H were used as a negative control (blue). **(B)** Endpoint fluorescence intensities obtained from **(A)** versus concentration of target RNA with a linear regression curve. A slope of 6.15 having units of RFU/nM was used as a conversion coefficient throughout this study. All experiments shown here were repeated at least three times.
