# Supplementary material
Source: PubMed Central journal article supplement (PMC4106378)
Supplement: Supp_Fig3.pdf [file Supp_Fig3.pdf]

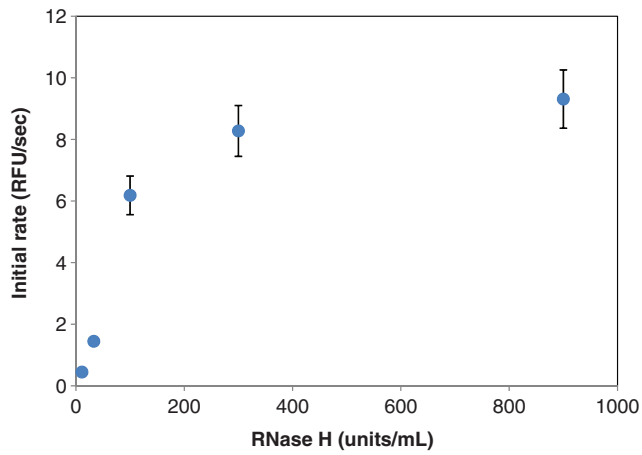

**SUPPLEMENTARY FIG. S3.** Effects of RNase H on initial turnover rate. Final concentrations of RNase H were 11, 33, 100, 300, and 900 units/mL in the presence of 10 nM ApoB-13a and 800 nM target RNA (DL-MRNA:NL-MRNA = 1:3) at 37°C.
