# Supplementary material
Source: PubMed Central journal article supplement (PMC4106378)
Supplement: Supp_Fig4.pdf [file Supp_Fig4.pdf]

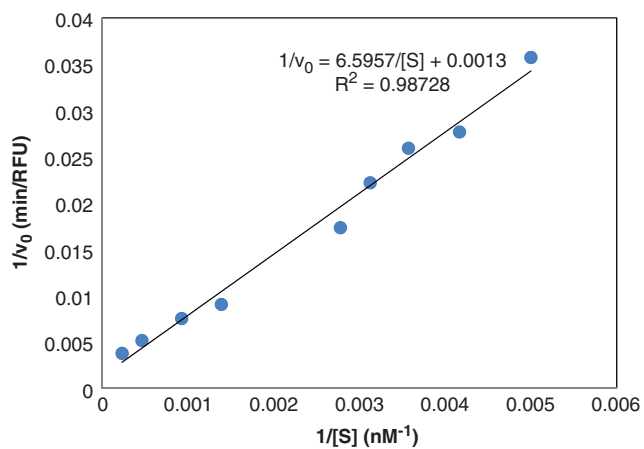

**SUPPLEMENTARY FIG. S4.** Lineweaver-Burk plot of multiple-turnover kinetics for ApoB-13a. Inverse of initial rates of multiple-turnover reactions were plotted versus  $1/[S]$ , where  $[S]$  indicates the concentration of DL-MRNA and is expressed in nM. AONs used in this study were ApoB-13a at a concentration of 2 nM at 28°C. Line equation for the Lineweaver-burk plot shown is  $y = 6.6x + 0.0013$ , resulting in the kinetic constants shown in Supplementary Table 2.
