# Supplementary material
Source: PubMed Central journal article supplement (PMC4106378)
Supplement: Supp_Fig5.pdf [file Supp_Fig5.pdf]

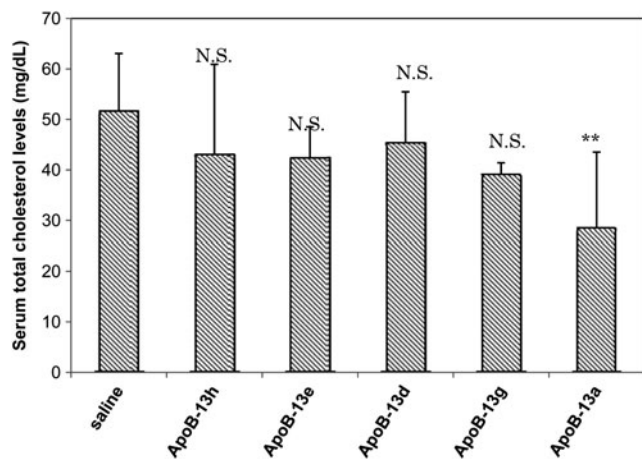

**SUPPLEMENTARY FIG. S5.** Reductions in serum total cholesterol in mice that received a single subcutaneous dose of  $0.75 \text{ mg kg}^{-1}$  of a series of 13-mer AONs rearranged in ascending order of  $T_m$  values related to Fig. 4 in the article. Dunnett's multiple comparison test, \*\*\* $p < 0.001$ , \*\* $p < 0.01$ , \* $p < 0.05$ ; N.S., not significant.
