# Supplementary material
Source: PubMed Central journal article supplement (PMC4106378)
Supplement: Supp_Table1.pdf [file Supp_Table1.pdf]

SUPPLEMENTARY TABLE S1. COMPARISON OF AVERAGE INITIAL TURNOVER RATE ( $v_0$ ) OF APOB-13A UNDER 100% DL-MRNA CONDITIONS WITH  $v_0$  OF APOB-13A UNDER MIXED (25% DL-MRNA, 75% NL-MRNA) CONDITIONS

| <i>DL-MRNA (nM)</i>            | <i>NL-MRNA (nM)</i> | $v_0$ (RFU/s) | <i>SD</i> | <i>CV</i> |
|--------------------------------|---------------------|---------------|-----------|-----------|
| 200                            | 600                 | 2.76          | 0.15      | 0.06      |
| 800                            | 0                   | 12.0          | 1.3       | 0.11      |
| $v_0$ (800 nM)/ $v_0$ (200 nM) |                     | 4.3           |           |           |

Reaction buffer: 7.5 mM KCl, 5 mM Tris-HCl, 0.3 mM MgCl<sub>2</sub>, 1 mM DTT.

Antisense oligonucleotide (AON): 10 nM ApoB-13a. Reaction temperature: 37°C.

DL-MRNA, dual-labeled complementary RNA probe; NL-MRNA, non-labeled complementary 20-mer RNA.
