# Supplementary material
Source: PubMed Central journal article supplement (PMC4106378)
Supplement: Supp_Table3.pdf [file Supp_Table3.pdf]

SUPPLEMENTARY TABLE S3. BLOOD CHEMISTRY TESTS FOR A SERIES OF LNA AONs ON MICE

|                 | <i>Dose</i> | <i>AST (Karmen)</i> | <i>ALT (Karmen)</i> | <i>LDH (U/l)</i> |
|-----------------|-------------|---------------------|---------------------|------------------|
| Saline          | –           | 56.2 ± 17.6         | 35.7 ± 14.8         | 681.0 ± 174.5    |
| <b>ApoB-13a</b> |             | 54.0 ± 15.6         | 42.0 ± 20.9         | 736.0 ± 252.2    |
| <b>ApoB-13e</b> |             | 45.7 ± 2.1          | 28.3 ± 3.5          | 508.0 ± 3.5      |
| <b>ApoB-13h</b> | 0.75 mg/kg  | 41.0 ± 2.0          | 25.3 ± 3.8          | 382.0 ± 3.8      |
| <b>ApoB-13d</b> |             | 39.7 ± 4.7          | 26.0 ± 4.4          | 404.0 ± 108.6    |
| <b>ApoB-13g</b> |             | 43.3 ± 4.0          | 26.0 ± 3.5          | 467.3 ± 105.3    |

AST, aspartate aminotransferase; ALT, alanine aminotransferase; LDH, lactate dehydrogenase. Data are presented as means ± SD. *n* = 3–6.
