# Supplementary material
Source: PubMed Central journal article supplement (PMC4106378)
Supplement: Supp_Table4.pdf [file Supp_Table4.pdf]

SUPPLEMENTARY TABLE S4. PHARMACOLOGICAL AND TOXICOLOGICAL EFFECTS OF CONTROL LNA PHOSPHOROTHIOATE OLIGONUCLEOTIDE ON MICE

|                      | <i>Dose</i>            | <i>Relative apoB mRNA</i> | <i>AST (Karmen)</i> | <i>ALT (Karmen)</i> |
|----------------------|------------------------|---------------------------|---------------------|---------------------|
| Saline               | –                      | 1.00 ± 0.07               | 43.5 ± 4.2          | 13.3 ± 1.5          |
| Control <sup>a</sup> | 30 mg/kg (single i.v.) | 0.88 ± 0.08               | 30.6 ± 4.2          | 11.4 ± 2.7          |

<sup>a</sup>Control oligonucleotide: 5'-CCTaggagtgcGCa-3' (LNA: uppercase, DNA: lowercase. All inter-nucleotide linkages are phosphorothioated). The control oligonucleotide has no target site on murine apoB mRNA.

AST, aspartate aminotransferase; ALT, alanine aminotransferase. Data are presented as means ± SD. *n* = 4.
